# Supplementary material
Source: MDPI journal article supplement (https://www.mdpi.com/2073-4441/14/4/573)
Supplement: s1 [file s1]

## Supplementary Materials

**Table S1.** Annual (CY) descriptive statistics for climate variables for two historical time windows [first row of each weather station corresponds to mean values and standard deviation in parenthesis while *slope b* (trends yr<sup>-1</sup>) of the linear equation ( $Y = a + bX$ ) for each variable are presented in the second row respectively] for 11 principal winegrape areas in Greece.

| Weather stations (winegrape areas) | TX mean (°C)       |                    | TN mean (°C)       |                    | PRCP (mm)          |                    |
|------------------------------------|--------------------|--------------------|--------------------|--------------------|--------------------|--------------------|
|                                    | 1980-1999          | 2000-2019          | 1980-1999          | 2000-2019          | 1980-1999          | 2000-2019          |
| Alexandroupoli (Maronia)           | 19.1 (0.6)<br>0.03 | 20.3 (0.6)<br>0.06 | 9.0 (0.5)<br>0.03  | 10.4 (0.7)<br>0.08 | 488 (115)<br>2.99  | 554 (167)<br>8.36  |
| Athens (Markopoulo)                | 22.0 (0.6)<br>0.06 | 22.9 (0.5)<br>0.04 | 14.1 (0.6)<br>0.07 | 14.7 (0.6)<br>0.05 | 368 (94)<br>0.20   | 386 (104)<br>5.00  |
| Crete (Peza)                       | 21.8 (0.5)<br>0.05 | 22.5 (0.5)<br>0.02 | 14.9 (0.4)<br>0.02 | 15.6 (0.5)<br>0.06 | 456 (103)<br>-5.02 | 476 (104)<br>-5.05 |
| Ioannina (Ioannina)                | 19.6 (0.6)<br>0.00 | 20.1 (0.6)<br>0.07 | 7.4 (0.4)<br>0.05  | 8.0 (0.5)<br>0.02  | 981 (157)<br>0.36  | 1079 (249)<br>9.21 |
| Kephalonia (Valsamata)             | 21.3 (0.4)<br>0.01 | 22.3 (0.4)<br>0.05 | 14.2 (0.4)<br>0.00 | 14.3 (0.4)<br>0.07 | 805 (171)<br>0.18  | 841 (194)<br>12.13 |
| Limnos (Limnos)                    | 19.3 (0.5)<br>0.01 | 20.3 (0.6)<br>0.07 | 11.5 (0.5)<br>0.02 | 12.6 (0.7)<br>0.08 | 454 (125)<br>8.25  | 562 (162)<br>2.05  |
| Larisa (Rapsani)                   | 21.3 (0.7)<br>0.05 | 22.2 (0.6)<br>0.04 | 8.8 (0.6)<br>0.07  | 9.8 (0.5)<br>0.04  | 429 (82)<br>-1.68  | 426 (97)<br>2.97   |
| Rodos (Ebonas)                     | 22.0 (0.4)<br>0.01 | 22.7 (0.5)<br>0.05 | 16.5 (0.5)<br>0.05 | 17.3 (0.4)<br>0.04 | 666 (187)<br>3.33  | 602 (163)<br>1.30  |
| Santorini (Santorini)              | 21.0 (0.5)<br>0.02 | 21.8 (0.6)<br>0.07 | 15.3 (0.6)<br>0.09 | 16.3 (0.5)<br>0.04 | 301 (155)<br>-6.92 | 320 (101)<br>0.23  |
| Thessaloniki (Epanomi)             | 20.3 (0.6)<br>0.04 | 21.0 (0.6)<br>0.04 | 10.3 (0.6)<br>0.07 | 11.5 (0.4)<br>0.03 | 423 (89)<br>-2.17  | 431 (111)<br>5.39  |
| Tripoli (Tripoli)                  | 19.9 (0.7)<br>0.03 | 20.2 (0.7)<br>0.07 | 6.9 (0.5)<br>-0.02 | 7.1 (1.2)<br>0.09  | 752 (152)<br>-8.09 | 743 (223)<br>12.74 |
| <i>Overall:</i>                    | 20.7 (0.6)<br>0.03 | 21.5 (0.6)<br>0.05 | 11.7 (0.5)<br>0.04 | 12.5 (0.6)<br>0.05 | 557 (130)<br>-0.8  | 584 (152)<br>4.9   |
| <i>Island locations</i>            | 21.1 (0.5)<br>0.02 | 21.9 (0.5)<br>0.05 | 14.5 (0.5)<br>0.04 | 15.2 (0.5)<br>0.06 | 536 (148)<br>0.0   | 560 (145)<br>2.1   |
| <i>Mainland locations</i>          | 20.4 (0.6)<br>0.04 | 21.1 (0.6)<br>0.05 | 9.4 (0.5)<br>0.05  | 10.3 (0.7)<br>0.05 | 574 (115)<br>-1.4  | 603 (159)<br>7.3   |

**Table S2.** Ripening period (RP: 45 days before harvest) descriptive statistics for climate variables for two historical time windows [first row of each weather station corresponds to mean values and standard deviation in parenthesis while *slope b* (trends yr<sup>-1</sup>) of the linear equation ( $Y = a + bX$ ) for each variable are presented in the second row respectively] for 11 principal winegrape areas in Greece.

| Weather stations (winegrape areas) | TX mean (°C)        |                    | TN mean (°C)       |                    | PRCP (mm)        |                  |
|------------------------------------|---------------------|--------------------|--------------------|--------------------|------------------|------------------|
|                                    | 1980-1999           | 2000-2019          | 1980-1999          | 2000-2019          | 1980-1999        | 2000-2019        |
| Alexandroupoli (Maronia)           | 29.4 (1.1)<br>0.03  | 31.2 (1.2)<br>0.14 | 16.6 (1.2)<br>0.06 | 18.9 (1.0)<br>0.11 | 16 (13)<br>1.03  | 28 (36)<br>-1.38 |
| Athens (Markopoulo)                | 31.1 (1.1)<br>0.11  | 32.4 (1.0)<br>0.03 | 21.9 (0.9)<br>0.11 | 23.0 (0.8)<br>0.06 | 5 (8)<br>-0.07   | 11 (20)<br>-0.24 |
| Crete (Peza)                       | 28.0 (0.8)<br>0.09  | 29.2 (0.8)<br>0.03 | 21.4 (0.6)<br>0.07 | 22.3 (0.6)<br>0.05 | 3 (8)<br>-0.11   | 8 (17)<br>-0.55  |
| Ioannina (Ioannina)                | 29.9 (1.4)<br>-0.03 | 30.5 (1.7)<br>0.16 | 14.5 (1.1)<br>0.08 | 15.2 (0.9)<br>0.04 | 56 (35)<br>-0.81 | 71 (72)<br>-1.52 |
| Kephalonia (Valsamata)             | 29.2 (1.0)<br>0.02  | 30.4 (0.9)<br>0.10 | 20.8 (1.0)<br>0.08 | 21.2 (0.8)<br>0.08 | 16 (21)<br>0.87  | 41 (48)<br>-1.44 |
| Limnos (Limnos)                    | 27.9 (0.8)<br>0.05  | 29.5 (0.8)<br>0.09 | 19.4 (0.8)<br>0.06 | 21.0 (1.0)<br>0.11 | 11 (14)<br>0.50  | 22 (27)<br>-0.41 |
| Larisa (Rapsani)                   | 31.5 (1.1)<br>0.04  | 32.5 (1.0)<br>0.08 | 16.6 (0.8)<br>0.09 | 18.1 (0.8)<br>0.06 | 26 (23)<br>0.17  | 37 (28)<br>1.62  |
| Rodos (Ebonas)                     | 29.2 (0.6)<br>0.01  | 30.1 (0.8)<br>0.06 | 23.6 (0.6)<br>0.06 | 24.5 (0.4)<br>0.04 | 1 (2)<br>0.13    | 3 (7)<br>0.31    |
| Santorini (Santorini)              | 28.1 (0.8)<br>0.04  | 29.3 (0.8)<br>0.08 | 21.7 (1.1)<br>0.15 | 23.1 (0.6)<br>0.03 | 1 (1)<br>0.03    | 3 (9)<br>0.29    |
| Thessaloniki (Epanomi)             | 30.2 (1.0)<br>0.06  | 31.2 (0.9)<br>0.07 | 18.4 (1.0)<br>0.12 | 20.2 (0.7)<br>0.02 | 28 (16)<br>0.71  | 34 (33)<br>1.47  |
| Tripoli (Tripoli)                  | 29.8 (1.4)<br>0.05  | 30.2 (1.5)<br>0.13 | 13.7 (0.9)<br>0.01 | 14.1 (1.6)<br>0.15 | 38 (36)<br>2.14  | 44 (40)<br>0.35  |
| <i>Overall:</i>                    | 29.5 (1.0)<br>0.04  | 30.6 (1.0)<br>0.09 | 19.0 (0.9)<br>0.08 | 20.1 (0.8)<br>0.07 | 18 (16)<br>0.4   | 27 (31)<br>-0.1  |
| <i>Island</i>                      | 28.5 (0.8)<br>0.04  | 29.7 (0.8)<br>0.07 | 21.4 (0.8)<br>0.08 | 22.4 (0.7)<br>0.06 | 6 (9)<br>0.3     | 15 (22)<br>-0.4  |
| <i>Mainland</i>                    | 30.3 (1.2)<br>0.04  | 31.3 (1.2)<br>0.10 | 17.0 (1.0)<br>0.08 | 18.3 (1.0)<br>0.07 | 28 (22)<br>0.5   | 38 (38)<br>0.1   |

**Table S3.** Descriptive statistics for dryness index (DI) for two historical time windows during the period of April to September [first row of each weather station corresponds to mean values and standard deviation in parenthesis while *slope b* (trends yr<sup>-1</sup>) of the linear equation ( $Y = a + bX$ ) for each variable are presented in the second row respectively] for 11 principal winegrape areas in Greece.

| Weather stations (winegrape areas) | DI                   |                     |
|------------------------------------|----------------------|---------------------|
|                                    | 1980-1999            | 2000-2019           |
| Alexandroupoli (Maronia)           | -109 (39.5)<br>1.21  | -91 (65.2)<br>-0.36 |
| Athens (Markopoulo)                | -98 (22.5)<br>-0.58  | -101 (37.5)<br>2.33 |
| Crete (Peza)                       | -41 (21.2)<br>-1.64  | -41 (26.5)<br>1.06  |
| Ioannina (Ioannina)                | -116 (69.3)<br>1.00  | -87 (98.4)<br>-0.86 |
| Kephalonia (Valsamata)             | -29 (47.4)<br>1.38   | -31 (60.0)<br>1.90  |
| Limnos (Limnos)                    | -52 (37.2)<br>1.55   | -36 (54.4)<br>-0.25 |
| Larisa (Rapsani)                   | -166 (62.2)<br>4.13  | -176 (43.5)<br>0.91 |
| Rodos (Ebonas)                     | -14 (30.2)<br>2.27   | -9 (25.2)<br>1.67   |
| Santorini (Santorini)              | -33 (28.6)<br>2.80   | -30 (25.5)<br>-1.74 |
| Thessaloniki (Epanomi)             | -103 (41.2)<br>1.11  | -71 (47.6)<br>1.64  |
| Tripoli (Tripoli)                  | -183 (49.2)<br>-0.41 | -166 (62.2)<br>4.13 |
| <i>Overall:</i>                    | -86 (40.8)<br>1.17   | -76 (49.6)<br>0.95  |
| <i>Island</i>                      | -34 (32.9)<br>1.27   | -29 (38.3)<br>0.52  |
| <i>Mainland</i>                    | -129 (47.3)<br>1.08  | -115 (59.1)<br>1.30 |

**Table S4.** Differences in the medians (Wilcoxon test) for climate variables for two historical time windows (1980-1999 and 2000-2019) during the growing season (GS: April-October) for 11 principal winegrape areas in Greece. Bold letters indicate statistically significant trends (p-value < 0.05), while italicized bold letters indicate lower statistical significance (p-value < 0.10).

| Weather stations (winegrape areas) | TX mean (°C) |            | TN mean (°C) |             | PRCP (mm)   |             | DI        |           |
|------------------------------------|--------------|------------|--------------|-------------|-------------|-------------|-----------|-----------|
|                                    | 1980-1999    | 2000-2019  | 1980-1999    | 2000-2019   | 1980-1999   | 2000-2019   | 1980-1999 | 2000-2019 |
| Alexandroupoli (Maronia)           | 170          | 202        | <b>24.9</b>  | <b>26.3</b> | <b>13.2</b> | <b>14.9</b> | -120      | -113      |
| Athens (Markopoulo)                | 104          | 123        | <b>26.8</b>  | <b>28.1</b> | <b>18.1</b> | <b>19.0</b> | -101      | -94       |
| Crete (Peza)                       | 98           | 74         | <b>25.3</b>  | <b>26.1</b> | <b>18.0</b> | <b>18.8</b> | -46       | -47       |
| Ioannina (Ioannina)                | 381          | 422        | 25.5         | 26.1        | <b>11.3</b> | <b>12.0</b> | -141      | -104      |
| Kephalonia (Valsamata)             | 248          | 265        | <b>25.5</b>  | <b>26.4</b> | 17.5        | 17.7        | -24       | -47       |
| Limnos (Limnos)                    | <b>114</b>   | <b>185</b> | <b>24.2</b>  | <b>25.1</b> | <b>15.4</b> | <b>16.5</b> | -62       | -56       |
| Larisa (Rapsani)                   | 197          | 242        | <b>27.8</b>  | <b>28.4</b> | <b>13.2</b> | <b>14.5</b> | -169      | -178      |
| Rodos (Ebonas)                     | 77           | 84         | <b>25.9</b>  | <b>26.5</b> | <b>19.8</b> | <b>20.9</b> | -21       | -17       |
| Santorini (Santorini)              | 37           | 40         | <b>25.0</b>  | <b>25.7</b> | <b>18.6</b> | <b>19.8</b> | -28       | -32       |
| Thessaloniki (Epanomi)             | 208          | 216        | <b>26.2</b>  | <b>26.9</b> | <b>14.9</b> | <b>16.3</b> | -107      | -68       |
| Tripoli (Tripoli)                  | 227          | 242        | 25.4         | 25.7        | 10.4        | 11.0        | -184      | -169      |
| Overall:                           | <b>183</b>   | <b>208</b> | 25.6         | 26.5        | 15.5        | 16.4        | -93       | -87       |
| Island locations                   | 117          | 128        | 25.2         | <b>26.0</b> | 17.8        | <b>18.7</b> | -32       | -28       |
| Mainland locations                 | <b>226</b>   | <b>257</b> | 26.1         | <b>27.0</b> | <b>13.6</b> | <b>14.7</b> | -146      | -121      |

**Table S5.** Results of mixed effect model analysis of Greek wine quality ratings with climate.

| Model                                                                              | Fixed components | Range of estimate | p-value |
|------------------------------------------------------------------------------------|------------------|-------------------|---------|
| WQRS=TX_GS+TN_GS+DI+PRCP_GS                                                        | intercept        | 41.59 - 50.73     | ***     |
|                                                                                    | TX_GS            | 1.83 - 2.22       | ***     |
|                                                                                    | TN_GS            | -0.61 - -0.84     | ***     |
|                                                                                    | DI               | 0.03              | ***     |
|                                                                                    | Prcp_GS          | -0.01             | **      |
| <i>Model summary ranges</i>                                                        |                  |                   |         |
| <i>Number of varieties: 12 - 14</i>                                                |                  |                   |         |
| <i>Number of observations: 168 - 197</i>                                           |                  |                   |         |
| <i>Marginal R<sup>2</sup> / Conditional R<sup>2</sup>: 0.20 – 0.26/0.28 – 0.47</i> |                  |                   |         |
| Significant codes: *** <0.001, **<0.01.                                            |                  |                   |         |

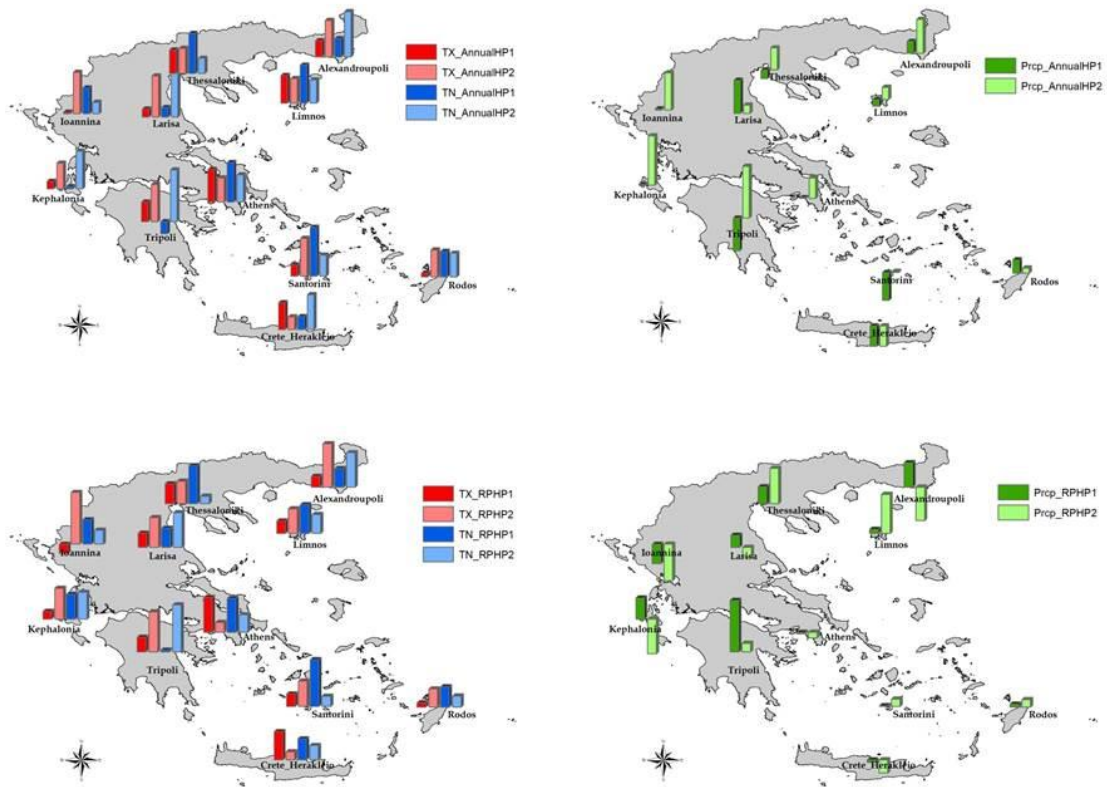

**Figure S1.** Directions and magnitudes of trends of mean maximum (TX, red bars) and minimum (TN, blue bars) air temperature (°C) and precipitation (PRCP, mm, green bars) for two historical time windows. Top graphs referred to the calendar year (CY) while bottom graphs referred to ripening period (RP), respectively.
